# Supplementary material for: Effect of surface chemistry on bio-conjugation and bio-recognition abilities of 2D germanene materials
Source: Royal Society of Chemistry journal article supplement (doi:10.1039/d0nr07579e), 2021-01-01
Supplement: d0nr07579e1.pdf [file d0nr07579e1.pdf]

***Supporting Information***

# **Effect of Surface Chemistry on Bio-conjugation and Bio-recognition Abilities of 2D Germanene Materials**

Ang Wei Li<sup>a</sup>, Jiri Sturala<sup>b</sup>, Nikolas Antonatos<sup>b</sup>, Zdeněk Sofer<sup>b</sup>, Alessandra Bonanni<sup>a\*</sup>

<sup>a</sup>Division of Chemistry & Biological Chemistry, School of Physical and Mathematical Sciences, Nanyang Technological University, Singapore 637371

<sup>b</sup>Department of Inorganic Chemistry, University of Chemistry and Technology Prague, Technická 5, 166 28 Prague 6, Czech Republic

Email: [a.bonanni@ntu.edu.sg](mailto:a.bonanni@ntu.edu.sg)

\*Author for correspondence

**Background line shape:** Linear for Ge 2p, Shirley for C 1s.

**Peak line shape:** Product of a Gaussian with a Lorentzian (GL(30)) as defined in Casa XPS software.

|                         | MATERIAL | Ge 2p <sub>3/2</sub>     |                         | C 1s                    |                        |
|-------------------------|----------|--------------------------|-------------------------|-------------------------|------------------------|
|                         |          | Ge-C/H                   | Ge-Ox                   | Adv C                   | C-Ge                   |
| POSITION<br>FWHM<br>(%) | Ge-Me    | 1218.7<br>4.1<br>(96.0%) | 1220.9<br>2.0<br>(4.0%) | 285.2<br>3.2<br>(73.6%) | 283.2<br>3.5<br>(26.4) |
|                         | Ge-H     | 1218.5<br>4.1<br>(94.6%) | 1221.2<br>1.5<br>(5.4%) | 284.9<br>3.4<br>(100%)  | -                      |

Table S1: Parameters for XPS fitting used in Figure 1 corresponding to Ge-Me and Ge-H.

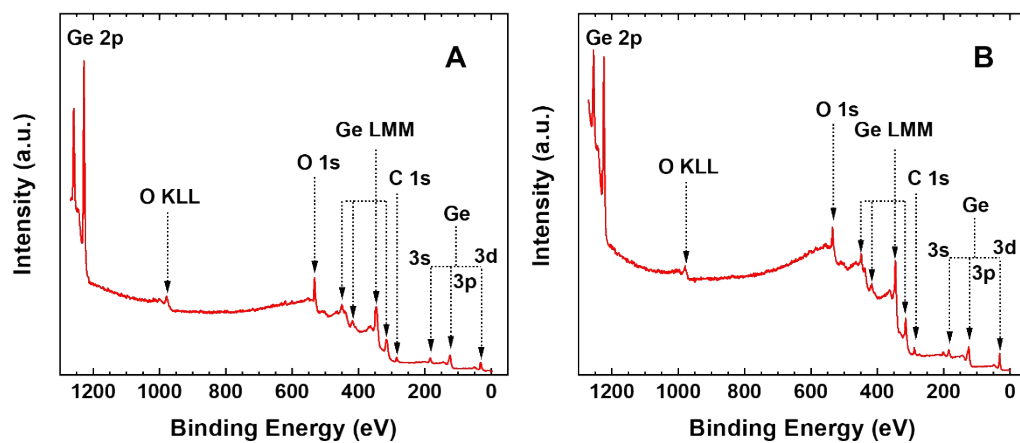

Figure S1: X-ray Photoelectron Spectroscopy (XPS) spectra for survey scans with Ge-Me (A) and Ge-H (B).

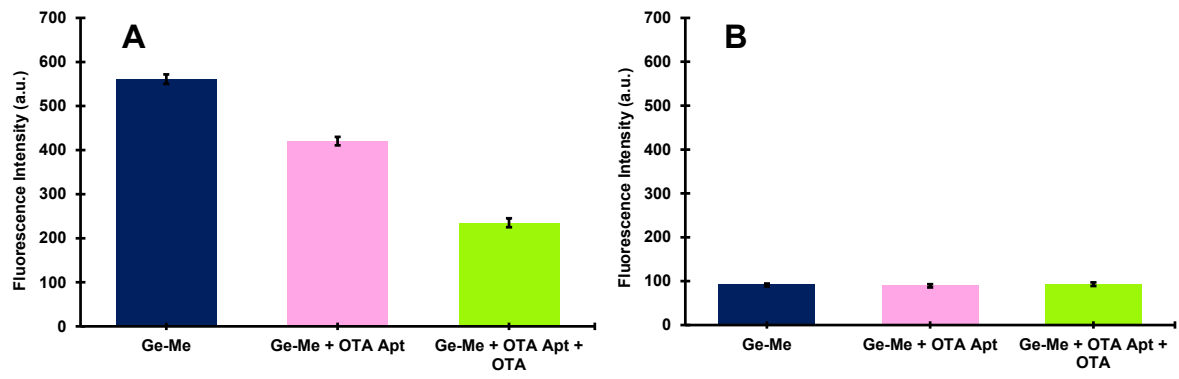

Figure S2: Histogram plot illustrating the preliminary experiment involving (A) Ge-Me and (B) Ge-H before and after conjugation with OTA aptamer and OTA. Error bars correspond to triplicate measurements performed.

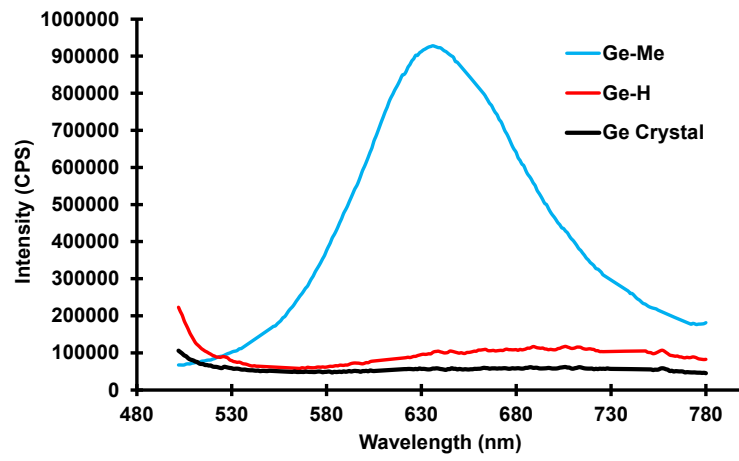

Figure S3: Photoluminescence (PL) spectra of Ge crystal, Ge-H and Ge-Me.

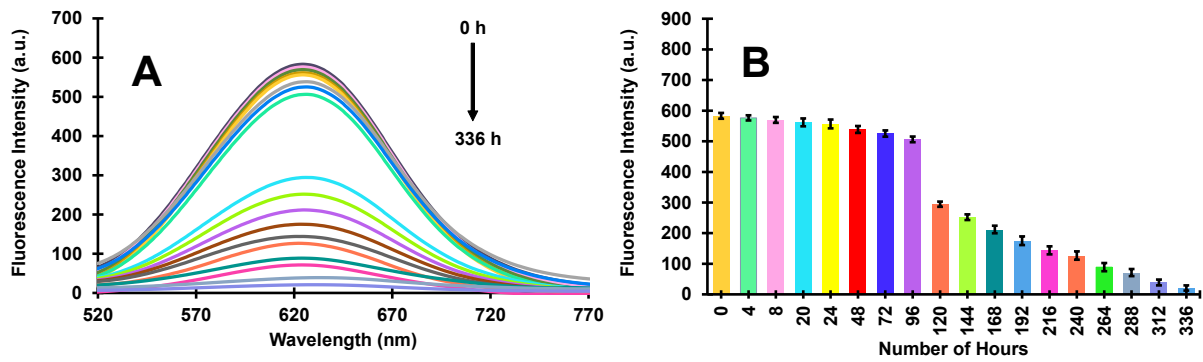

Figure S4: (A) Lifetime study performed with 1 mg/mL of Ge-Me (ranging from 0 mins to 336 hours). (B) Corresponding histogram plots displaying the change in fluorescence intensity over time.

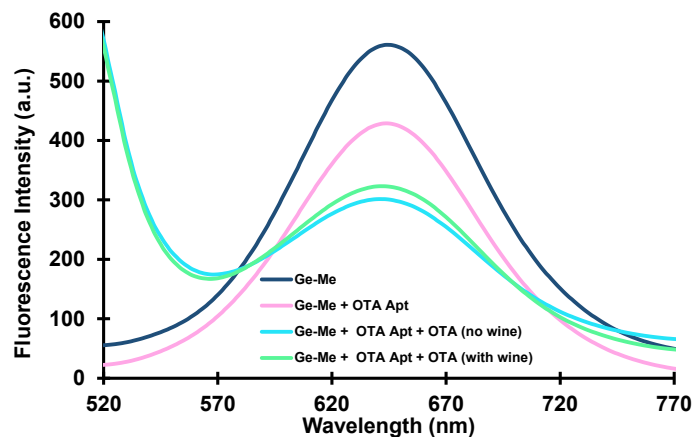

Figure S5: Application of developed biosensing assay towards the use of red wine samples spiked with 10  $\mu$ M incubated with 1 mg/mL of Ge-Me with 150 nM OTA Aptamer, displayed in the form of Fluorescence emission spectra.

Table S2: Results of standard additions method to calculate the recoveries in the real sample matrix (red wine).

| <b>Sample</b>           | <b>Average</b> | <b>Recovery</b> |
|-------------------------|----------------|-----------------|
| <i>OTA without Wine</i> | 298 $\pm$ 4    | 92.4%           |
| <i>OTA with Wine</i>    | 323 $\pm$ 3    |                 |
